# Supplementary material for: COVID-19 Vaccine Acceptability: A Cross-Sectional Mixed Methods Study in Sierra Leone
Source: Research Square preprint supplement (doi:10.21203/rs.3.rs-625455/v1), 2021-06-30
Supplement: Supplementary file 1 [file 099b1fd2a8b8dbc4e0c27c0b.docx]

COVID-19 Vaccine acceptability: A cross-sectional mixed methods study in Sierra Leone

***Appendix***

**QUESTIONNAIRE**

**Study Title:** COVID-19 vaccine acceptability: A cross-sectional mixed methods study in Sierra Leone

**INSTRUCTIONS**

Please mark with **[X]** in the boxes, or write your answers in the blanks where applicable.

| **A: Demographics** | | |
| --- | --- | --- |
|  | Gender | 1. Female [ ] 2. Male [ ] |
|  | Age (years) | 1. 18-24 [ ] 2. 25-54 [ ] 3. 55-64 [ ] 4. 65+ [ ] |
|  | Region | 1. East (Kailahun, Kenema, and Kono) [ ] 2. West (Western Area Urban, Western Area Rural, Port Loko) [ ] 3. North (Bombali, Tonkolili, Kambia, Karene, Koinadugu, Falaba) [ ] 4. South (Bo, Bonthe, Moyamba, Pujehun) [ ] |
|  | Level of education | 1. No school or less than high school [ ] 2. High school or some college (e.g., diploma) [ ] 3. Bachelor’s degree [ ] 4. Postgraduate degree [ ] |
|  | Employment status | 1. Employed_ full time [ ] 2. Unemployed [ ] 3. Student [ ] 4. Self-employed [ ] |
|  | Household income level per day? | 1. < SLL 20,000 (< $2) [ ] 2. SLL 20,000 to 40,000 ($2-$4) [ ] 3. SLL 41,000 to 80,000 ($4.1-$8) [ ] 4. SLL 81,000+ ($8.1+) |
| **B: COVID-19 Vaccine awareness and acceptability** | | |
|  | Are you aware of the availability of COVID-19 vaccine? | 1. Yes [ ] 2. No [ ] |
|  | Will you accept COVID-19 vaccine for yourself? | 1. Yes, definitely [ ] 2. No, definitely not [ ] 3. Unsure but leaning towards yes [ ] 4. Unsure but leaning towards no [ ] |
|  | Will you accept COVID-19 vaccine for your close relatives including children (if any)? | 1. Yes, definitely [ ] 2. No, definitely not [ ] 3. Unsure but leaning towards yes [ ] 4. Unsure but leaning towards no [ ] |
|  | Will you accept COVID-19 vaccine if recommended by law or employer? | 1. Yes, definitely [ ] 2. No, definitely not [ ] 3. Unsure but leaning towards yes [ ] 4. Unsure but leaning towards no [ ] |
|  | Would you reject a COVID-19 vaccine from any of these countries even if licensed locally? (Check all that applies) | 1. United Kingdom (UK) [ ] 2. America (USA) [ ] 3. Germany [ ] 4. Belgium [ ] 5. China [ ] 6. Russia [ ] 7. India [ ] |
|  | What vaccine profile would you preferred? | 1. A vaccine with higher efficacy but also higher adverse events [ ] 2. A vaccine with lower efficacy but also less adverse events [ ] |
|  | Reasons for accepting COVID-19 vaccine for self and relatives (check all that applies) | 1. Protect vaccinee and others [ ] 2. Benefits of vaccine outweigh risk [ ] 3. I am at risk or close to at risk group [ ] 4. Vaccines are important and I believe in vaccine [ ] 5. If recommended [ ] 6. Trust vaccine/science/healthcare workers [ ] 7. To stay safe [ ] 8. For work [ ] 9. Less risk [ ] |
|  | Reasons for **NOT** accepting COVID-19 vaccine for self and relatives (check all that applies) | 1. Lack of trust [ ] 2. New/rushed vaccine/not enough evidence 3. Do not believe that COVID-19 is real [ ] 4. Concerns about safety and effectiveness [ ] 5. Concerns about vaccine contents [ ] 6. Not in an at risk group [ ] 7. Lack of information [ ] 8. Low risk of catching or spreading COVID-19 [ ] 9. New disease/not much is known [ ] |
| **C: Structured Interviews** | | |
|  | Reasons for accepting COVID-19 vaccine for self and relatives | 1. …………………………………………………………………………………………….. 2. …………………………………………………………………………………………….. 3. …………………………………………………………………………………………….. 4. …………………………………………………………………………………………….. 5. …………………………………………………………………………………………….. 6. …………………………………………………………………………………………….. 7. …………………………………………………………………………………………….. |
|  | Reasons for **NOT** accepting COVID-19 vaccine for self and relatives | 1. …………………………………………………………………………………………….. 2. …………………………………………………………………………………………….. 3. …………………………………………………………………………………………….. 4. …………………………………………………………………………………………….. 5. …………………………………………………………………………………………….. 6. …………………………………………………………………………………………….. 7. …………………………………………………………………………………………….. |
|  |  | |
